# Supplementary material for: Prevalence of Cannabis Use Disorder and Reasons for Use Among Adults in a US State Where Recreational Cannabis Use Is Legal
Source: PubMed Central journal article supplement (PMC10466162; doi:10.1001/jamanetworkopen.2023.28934), 2023-08-29
Supplement: jamanetwopen-e2328934-s002.pdf [file jamanetwopen-e2328934-s002.pdf]

## Data Sharing Statement

Lapham. Prevalence of Cannabis Use Disorder and Reasons for Use Among Adults in a US State Where Recreational Cannabis Use Is Legal. *JAMA Netw Open*. Published August 29, 2023. doi:10.1001/jamanetworkopen.2023.28934

### Data

**Data available:** No
